# Supplementary material
Source: PubMed Central journal article supplement (PMC5643199)
Supplement: NIHMS910595-supplement-S1.pdf [file NIHMS910595-supplement-S1.pdf]

HEALTH RELEVANCE OF TIME STRUCTURE

(c)

|                   | 1. Age | 2. CESD | 3. Social Activities | 4. Self-focused Activities | 5. Exercise | 6. Sense of Purpose | 7. Structured Routine | 8. Present Orientation | 9. Effective Organization | 10. Persistence |
|-------------------|--------|---------|----------------------|----------------------------|-------------|---------------------|-----------------------|------------------------|---------------------------|-----------------|
| <i>Homemakers</i> |        |         |                      |                            |             |                     |                       |                        |                           |                 |
| 1                 | 79.11  |         |                      |                            |             |                     |                       |                        |                           |                 |
| 2                 | -19.63 | 173.31  |                      |                            |             |                     |                       |                        |                           |                 |
| 3                 | 0.15   | -6.01   | 0.98                 |                            |             |                     |                       |                        |                           |                 |
| 4                 | 1.70   | -4.70   | 0.56                 | 1.03                       |             |                     |                       |                        |                           |                 |
| 5                 | 2.74   | -6.49   | 0.57                 | 0.61                       | 2.41        |                     |                       |                        |                           |                 |
| 6                 | 11.74  | -49.58  | 2.30                 | 1.32                       | 1.98        | 45.26               |                       |                        |                           |                 |
| 7                 | 2.37   | -10.70  | 0.09                 | 0.50                       | 0.25        | 3.62                | 13.54                 |                        |                           |                 |
| 8                 | 9.45   | -10.63  | 0.28                 | 0.10                       | 0.45        | 9.90                | 2.09                  | 12.77                  |                           |                 |
| 9                 | 7.77   | -36.70  | 1.87                 | 1.26                       | 1.07        | 28.78               | 0.62                  | 7.63                   | 35.85                     |                 |
| 10                | 7.07   | -22.57  | 0.87                 | 0.56                       | 1.01        | 17.82               | -0.25                 | 4.66                   | 14.63                     | 16.07           |
| Mean              | 33.40  | 17.27   | 2.61                 | 2.35                       | 2.30        | 22.37               | 21.31                 | 10.57                  | 17.55                     | 15.50           |
| SD                | 8.89   | 13.16   | 0.99                 | 1.01                       | 1.55        | 6.73                | 3.68                  | 3.57                   | 5.99                      | 4.01            |
| N                 | 111    | 111     | 111                  | 111                        | 111         | 111                 | 111                   | 111                    | 111                       | 111             |

## HEALTH RELEVANCE OF TIME STRUCTURE

**Table S2.** Patterns of direct and indirect relationships between activity and depressive symptoms.

|                              | Relationship with depressive symptoms |          |           |          | Model Fit    |
|------------------------------|---------------------------------------|----------|-----------|----------|--------------|
|                              | Direct                                |          | Indirect* |          |              |
|                              | <i>B</i>                              | <i>p</i> | <i>B</i>  | <i>p</i> | <i>RMSEA</i> |
| <i>Self-focused Activity</i> |                                       |          |           |          |              |
| Unemployed                   | -.10                                  | .22      | -3.96     | .001     | .050         |
| Employed                     | -.23                                  | <.001    | -2.03     | .002     | .123         |
| Homemakers                   | -.23                                  | .003     | -1.56     | .047     | .069         |
| <i>Social Activity</i>       |                                       |          |           |          |              |
| Unemployed                   | -.15                                  | .052     | -2.71     | .001     | .044         |
| Employed                     | -.29                                  | <.001    | -1.92     | .003     | .122         |
| Homemakers                   | -.28                                  | <.001    | -2.36     | .001     | .059         |
| <i>Exercise</i>              |                                       |          |           |          |              |
| Unemployed                   | -.05                                  | .53      | -1.36     | .003     | .050         |
| Employed                     | -.12                                  | .042     | -1.58     | .032     | .158         |
| Homemakers                   | -.21                                  | .008     | -.934     | .059     | .063         |

\*Indirect effects: Bootstrapped (2,000) and percentile based levels of significance
